# Supplementary material for: Combination Therapies Targeting Apoptosis in Paediatric AML: Understanding the Molecular Mechanisms of AML Treatments Using Phosphoproteomics
Source: Int J Mol Sci. 2023 Mar 16;24(6):5717. doi: 10.3390/ijms24065717 (PMC10058112; doi:10.3390/ijms24065717)
Supplement: Supplementary file 1 [file ijms-24-05717-s001.zip]

Archive with 4 entries (4 files):
- ijms-2211266-supplementary.pdf
- Supplementary  Figure S1 .tif
- Supplementary  Figure S2.tif
- Supplementary  Figure S3.tif
